# Supplementary material for: Manipulating electron redistribution to achieve exotic electronic pyroelectricity in dynamic [FeCo] crystals
Source: Research Square preprint supplement (doi:10.21203/rs.3.rs-241749/v1), 2021-02-23
Supplement: Supplementary file 1 [file a5657a60543afb0370ff499c.pdf]

## Supplementary Information

### Manipulating electron redistribution to achieve exotic electronic pyroelectricity in dynamic [FeCo] crystals

Pritam Sadhukhan<sup>1, #</sup>, Shu-Qi Wu<sup>1, #</sup>, Jeremy Ian Long<sup>1</sup>, Takumi Nakanishi<sup>1</sup>, Shinji Kanegawa<sup>1, \*</sup>,  
Kaige Gao<sup>2</sup>, Kaoru Yamamoto<sup>3</sup>, Hajime Okajima<sup>4</sup>, Akira Sakamoto<sup>4</sup>, Michael L. Baker<sup>5, 6</sup>, Thomas  
Kroll<sup>7</sup>, Dimosthenis Sokaras<sup>7</sup>, Atsushi Okazawa<sup>8</sup>, Norimichi Kojima<sup>9</sup>, Yoshihito Shiota<sup>1</sup>,  
Kazunari Yoshizawa<sup>1</sup>, and Osamu Sato<sup>1, \*</sup>

<sup>1</sup>Institute for Materials Chemistry and Engineering & IRCCS, Kyushu University, 744 Motooka, Nishi-ku, Fukuoka 819-0395, Japan.

<sup>2</sup>College of Physical Science and Technology, Yangzhou University, Jiangsu 225009, P. R. China.

<sup>3</sup>Department of Applied Physics, Okayama University of Science, Okayama 700-0005, Japan

<sup>4</sup>Graduate School of Science and Engineering, Aoyama Gakuin University, 5-10-1 Fuchinobe, Chuo-ku, Sagamihara, Kanagawa 252-5258, Japan.

<sup>5</sup>The Department of Chemistry, The University of Manchester, Manchester M13 9PL, UK.

<sup>6</sup>The Department of Chemistry, The University of Manchester at Harwell, Didcot OX11 0FA, UK.

<sup>7</sup>Stanford Synchrotron Radiation Lightsource, SLAC National Accelerator Laboratory, Stanford University, Menlo Park, California 94025, United States.

<sup>8</sup>Division of Chemistry, Institution of Liberal Education, Nihon University School of Medicine, 30-1 Oyaguchi Kamimachi, Itabashi-ku, Tokyo 173-8610, Japan.

<sup>9</sup>Department of Basic Science, Graduation School of Arts and Sciences, The University of Tokyo, 3-8-1 Komaba, Meguro-ku, Tokyo 153-8902, Japan.

<sup>#</sup>P.S. and S.-Q.W. contributed equally.

Correspondence and requests for materials should be addressed to S. K. (email: [kanegawa@cm.kyushu-u.ac.jp](mailto:kanegawa@cm.kyushu-u.ac.jp)) or to O. S. (email: [sato@cm.kyushu-u.ac.jp](mailto:sato@cm.kyushu-u.ac.jp)).

## Materials and Methods

**Synthesis of enantiopure  $[\text{Zn}(\text{AcO})(\text{RR-cth})](\text{PF}_6)$ :** A mixture of  $\text{Zn}(\text{AcO})_2$  (550 mg, 3.0 mmol) and  $\text{RR-cth}$  (850 mg, 3.0 mmol) in EtOH (10 ml) was heated to 60°C under a  $\text{N}_2$  atmosphere. After stirring at this temperature, solid  $\text{NH}_4\text{PF}_6$  (540 mg, 3.3 mmol) was added to the solution.  $[\text{Zn}(\text{AcO})(\text{RR-cth})](\text{PF}_6)$  then gradually precipitated within an hour. After the reaction mixture was cooled in an ice-bath, the precipitate was collected by filtration and washed with cold EtOH followed by  $\text{Et}_2\text{O}$ .

**Synthesis of  $[(\text{Co}(\text{SS-cth}))(\text{Zn}(\text{RR-cth}))(\mu\text{-dhibq})](\text{PF}_6)_2$ :** This compound was synthesized by sequential addition of equimolar  $[\text{Co}(\text{AcO})(\text{SS-cth})](\text{PF}_6)$  and  $[\text{Zn}(\text{AcO})(\text{RR-cth})](\text{PF}_6)$  in the basic solution of 3,5-dihydroxy-1,4-benzoquinone in the same manner as described for the synthesis of  $[(\text{Fe}(\text{RR-cth}))(\text{Co}(\text{SS-cth}))(\mu\text{-dhibq})](\text{PF}_6)_2$ .

**Synthesis of  $[(\text{Co}(\text{SS-cth}))(\text{Zn}(\text{RR-cth}))(\mu\text{-dhibq})](\text{PF}_6)_3$ :** To a solution of  $[(\text{Co}(\text{SS-cth}))(\text{Zn}(\text{RR-cth}))(\mu\text{-dhibq})](\text{PF}_6)_2$  (0.3 mmol) dissolved in MeCN (60 ml), solid  $\text{AgPF}_6$  (76 mg, 0.3 mmol) and  $\text{H}_2\text{O}$  (1 ml) were added. After stirring for 10 min, the mixture was filtered to remove Ag. The filtrate was evaporated to dryness under reduced pressure and the crude product was collected as a solid and washed with a small amount of  $\text{H}_2\text{O}$ . The crude product was recrystallized from a mixed solvent of several drops of MeCN and hot  $\text{H}_2\text{O}/\text{MeOH}$  to afford crystals suitable for pyroelectric measurements. Elemental analysis calcd. for  $\text{C}_{38}\text{H}_{74}\text{N}_8\text{O}_4\text{F}_{18}\text{P}_3\text{ZnCo}$ : C: 36.04, H: 5.89, N: 8.85; found: C: 36.04, H: 5.95, N: 8.86. ESI MS (Supplementary Fig. 11):  $m/z = 1121.3$   $\{[\text{ZnCo}](\text{PF}_6)_2\}^+$  (calcd for  $\text{C}_{38}\text{H}_{74}\text{N}_8\text{O}_4\text{ZnCoP}_2\text{F}_{12}$ : 1121.11).

## X-ray diffraction measurements and crystal structural determination

Diffraction data were collected at 60 K under a helium gas stream and at 100, 150, 200, 250, and 300 K under a cold nitrogen gas stream on a Rigaku FR-E+ diffractometer equipped with a HyPix-6000 area detector and multi-layer mirror monochromated Mo- $K\alpha$  radiation ( $\lambda = 0.71073 \text{ \AA}$ ). The

structures were solved by a direct method and refined *via* full-matrix least-squares on  $F^2$  using the SHELX program<sup>48</sup> implemented in the OLEX2 program<sup>49</sup> with anisotropic thermal parameters for all non-hydrogen atoms. The hydrogen atoms were geometrically added and refined by the riding model.

### **Magnetic measurements**

Magnetic susceptibility measurements were performed on a quantum design SQUID magnetometer (MPMS-5S). Polycrystalline samples (ca. ~10 mg) were loaded into a gelatin capsule, which was fixed on a sample rod with a plastic straw. Measurements were conducted with  $H = 1000$  Oe in the temperature range of 5–300 K.

### **Mössbauer spectroscopy**

The  $^{57}\text{Fe}$  Mössbauer spectra were recorded on a constant acceleration spectrometer with a  $^{57}\text{Co}/\text{Rh}$  source in the transmission mode. The measurements were performed in a closed-cycle helium refrigerator (Iwatani Industrial Gases Corp.) and a conventional Mössbauer spectrometer (Topologic Systems). All isomer shifts are reported relative to  $\alpha\text{-Fe}$  at room temperature. The Mössbauer spectra were fitted with the least-squares fitting program MossWinn 4.0.

### **IR spectroscopy**

Temperature-dependent IR spectra were recorded by using an FT-IR spectrophotometer (VERTEX 70, Bruker) equipped with a closed-cycle helium refrigerator cryostat (Nagase Techno-Engineering). The ground-powdered samples were held between grained and flat  $\text{CaF}_2$  plates.

### **Density functional theory (DFT) calculations**

DFT calculations for the  $[\text{FeCo}]$  dinuclear complex in the singlet, triplet, quintet and septet spin states were performed by unrestricted DFT (UDFT) implemented in the Gaussian 09 program package<sup>50</sup>. To remove structural inaccuracies from incomplete spin transitions mentioned above, the DFT-optimized structures were used to compare the relative energies of different spin states and their corresponding vibrational spectra. For the Fe and Co atoms, the (14s9p5d)/[9s5p3d] primitive

set of the Wachters–Hay basis<sup>51,52</sup> with one polarization f-function was used, and for the H, C, N, and O atoms, the D95 basis set<sup>53</sup> was used. Whereas the relative energies of different spin states play a notable role in a multi-spin system, it is well known that DFT methods are less accurate at predicting small energy gaps between different spin states. The B3LYP functional<sup>53</sup> is often used to predict the geometry and spectroscopic properties of systems containing transition metals; however, this tends to overestimate the stability of the high-spin state<sup>54</sup>. Conversely, calculations based on the pure functional tend to overestimate the stability of the low-spin state. We used the B3LYP\* hybrid functional for the calculations for the estimation of accurate energy differences between different spin states. This functional is a re-parameterized version of the B3LYP hybrid functional originally suggested by Reiher and coworkers<sup>55</sup>. Vibrational analyses were performed for all spin states to ensure that no imaginary frequencies existed for all optimized geometries. The calculated IR spectra were scaled by 0.985 for comparison with the experimental results.

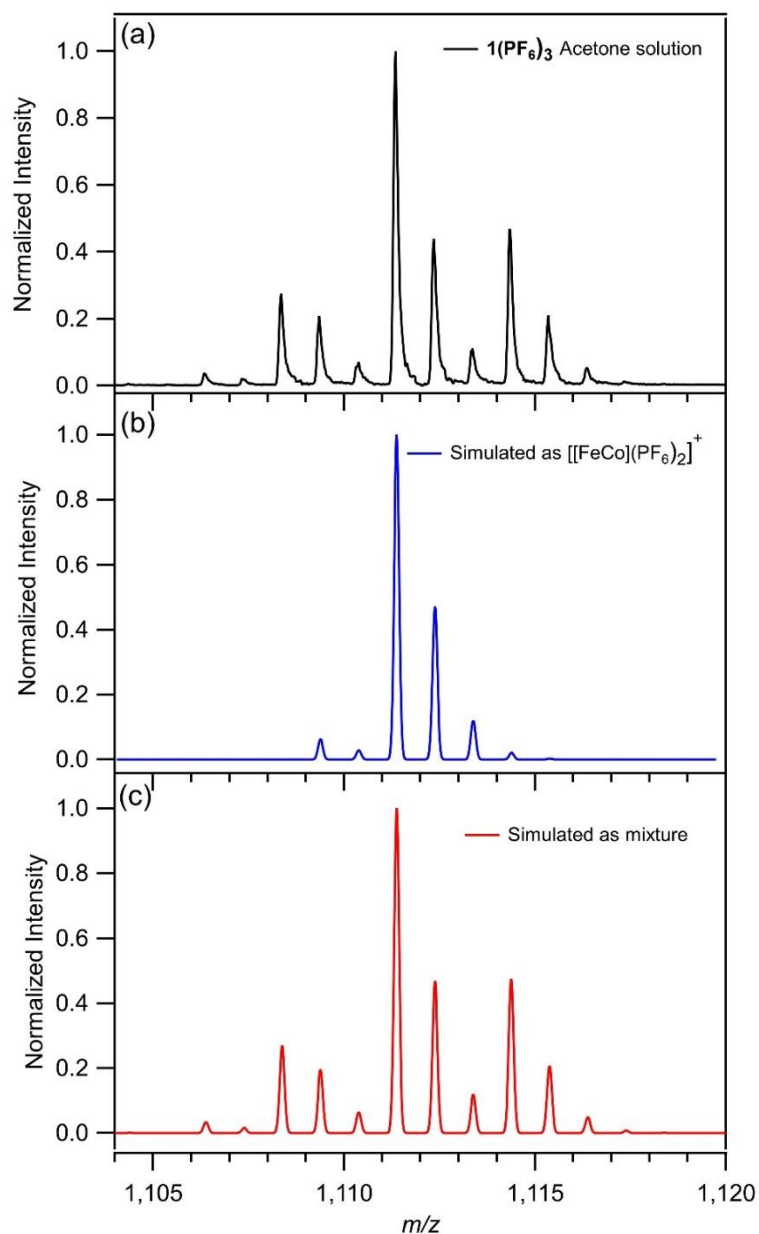

**Supplementary Fig. 1 | ESI-MS spectrum of  $1(\text{PF}_6)_3$  in acetone.** (a) The spectrum exhibits the molecular peak of  $[1(\text{PF}_6)_2]^+$  ( $m/z = 1111.5$ ). (b) Isotopic distribution simulation of  $[[\text{FeCo}](\text{PF}_6)_2]^+(\text{C}_{38}\text{H}_{74}\text{N}_8\text{O}_4\text{FeCoP}_2\text{F}_{12})$ . (c) Simulation of the mixture  $[[\text{FeCo}](\text{PF}_6)_2]^+ / [[\text{FeFe}](\text{PF}_6)_2]^+ / [[\text{CoCo}](\text{PF}_6)_2]^+ = 1.00/0.27/0.46$ . It should be noted that, even though  $[\text{FeFe}]$  and  $[\text{CoCo}]$  species are generated in solution, the selective crystallization of the  $[\text{FeCo}]$  species is supported by magnetometry and Co K-edge X-ray absorption spectroscopy. Indeed, there is no sign of valence tautomeric behavior from  $[\text{CoCo}]$  species in both measurements.

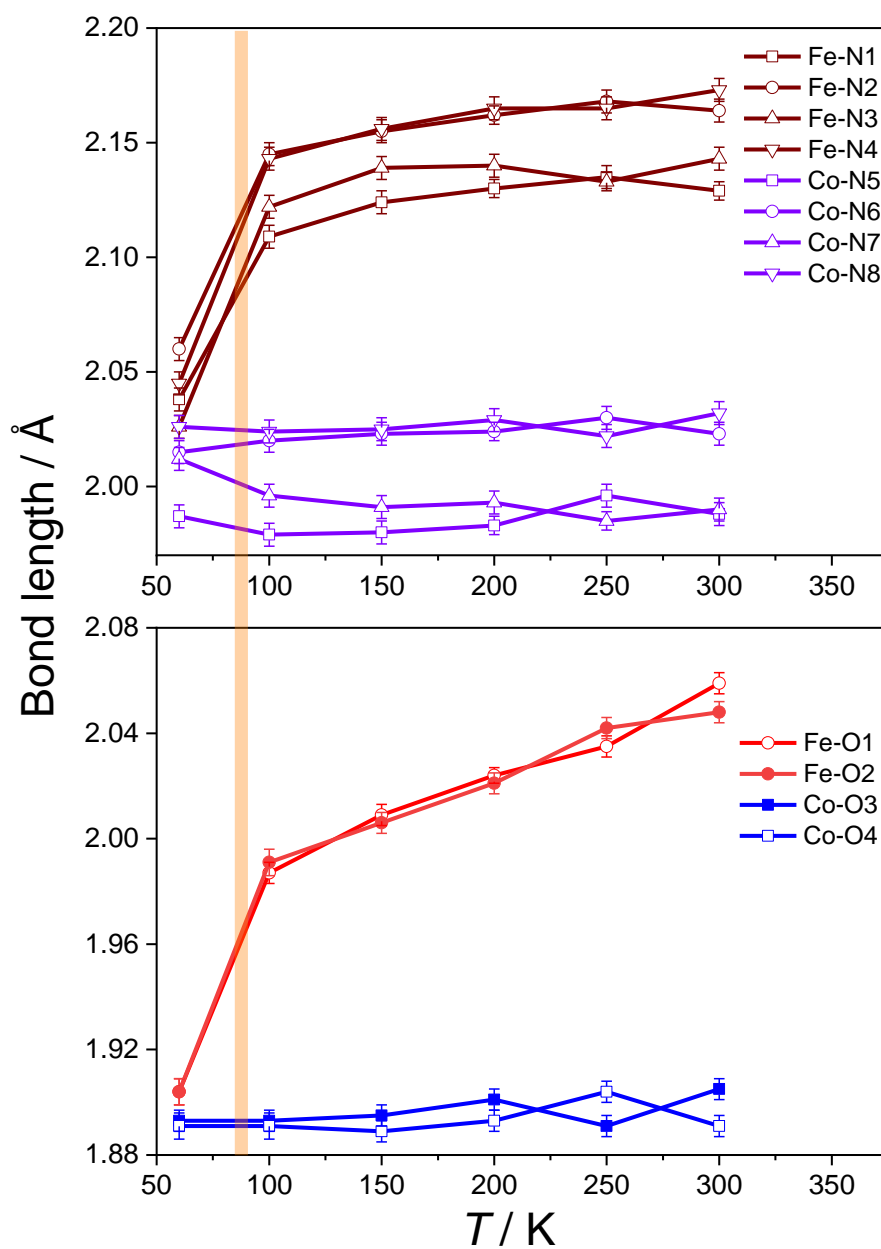

**Supplementary Fig. 2 | Changes in metal–ligand bond lengths with temperature for complex  $1(\text{PF}_6)_3$  (Numbers associated with O and N represent corresponding atoms in CIF).**

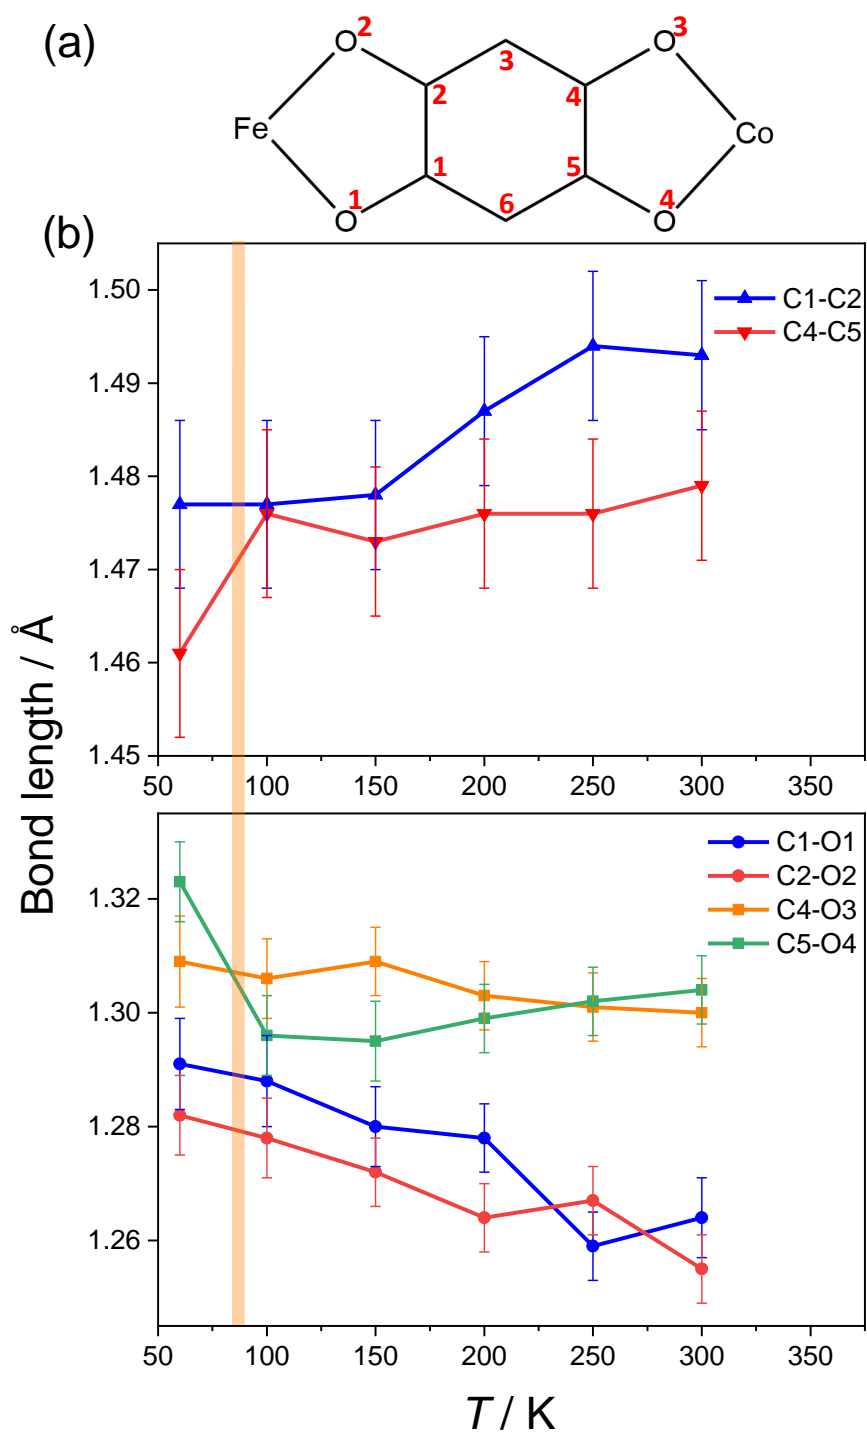

**Supplementary Fig. 3 | (a) Schematic indication of the specific bonds for complex 1(PF<sub>6</sub>)<sub>3</sub>. (b) Changes in some specific C–C and C–O bond lengths with temperature for complex 1(PF<sub>6</sub>)<sub>3</sub>.**

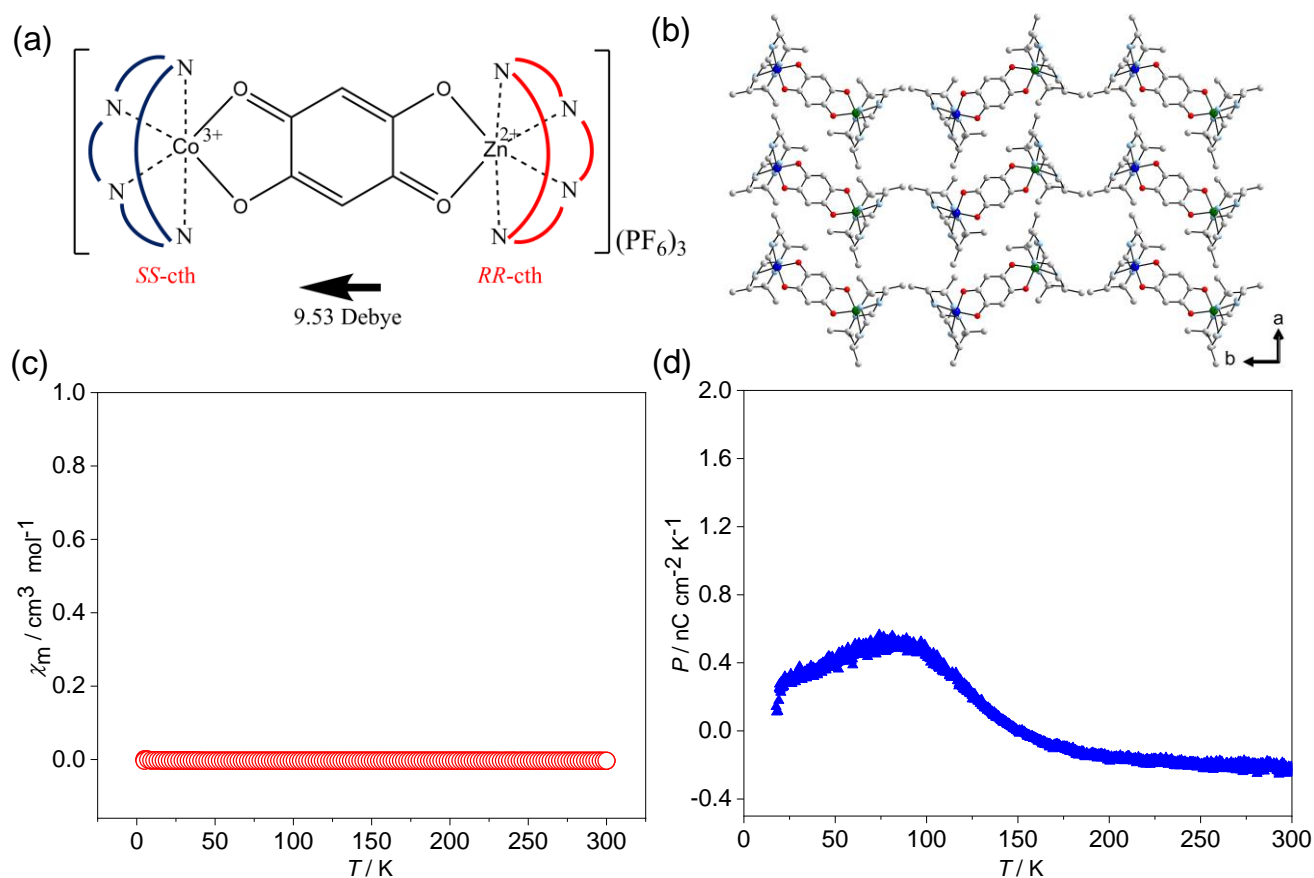

**Supplementary Fig. 4 | Characterization of reference compound  $[ZnCo](PF_6)_3$ .** (a) Molecular structure and calculated dipole moment of  $[(Zn(RR-cth))(Co(SS-cth))(\mu-dhbq)](PF_6)_3$ :  $[ZnCo](PF_6)_3$ . (b) Molecular packing of  $[ZnCo](PF_6)_3$ . [Zn(green), Co(blue), O(red), C(gray)] (c) Temperature dependence of magnetic susceptibilities displayed as a plot of  $\chi_m$  vs  $T$ . (d) Temperature dependence of the pyroelectric coefficient for  $[ZnCo](PF_6)_3$ .



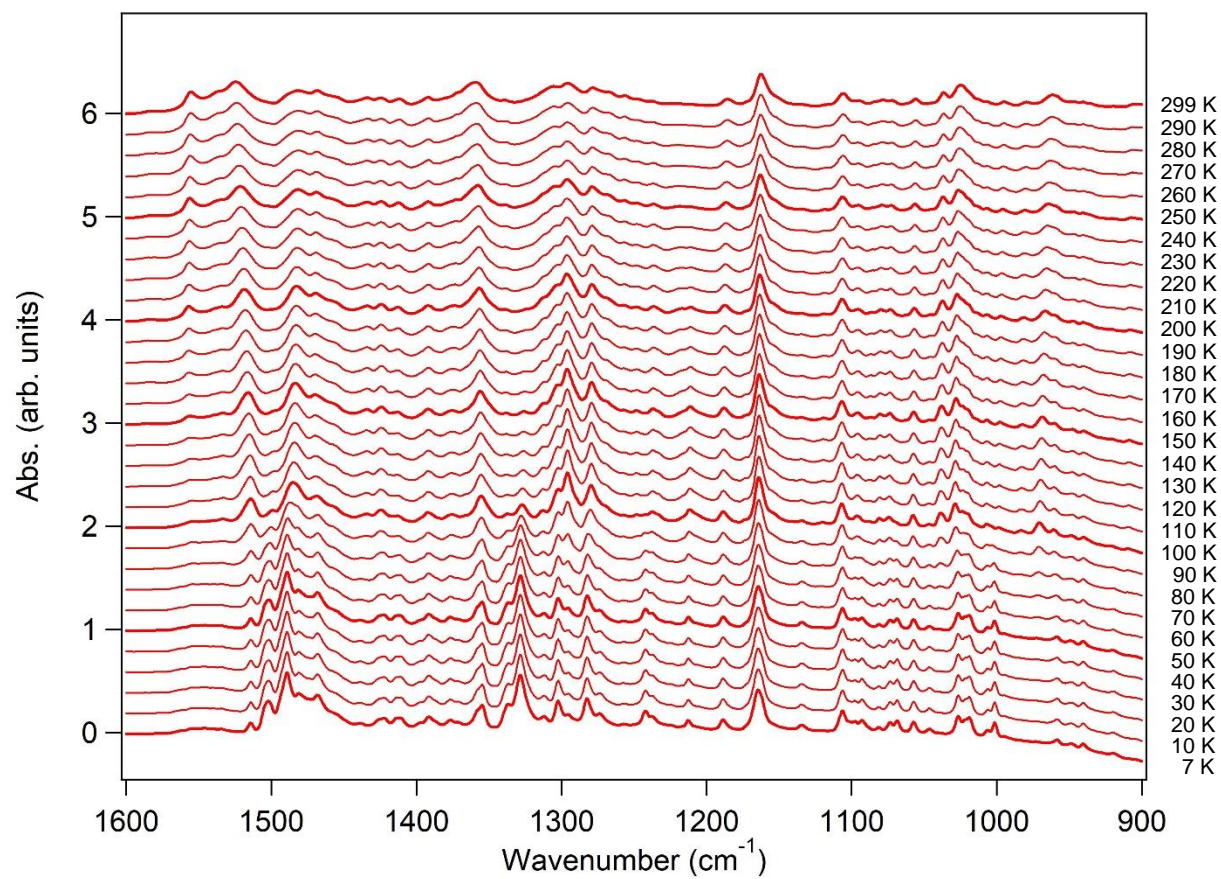

**Supplementary Fig. 5 | Variable-temperature infrared absorption spectra in the range of 900–1600  $\text{cm}^{-1}$  for a temperature range from 299 to 7 K.**

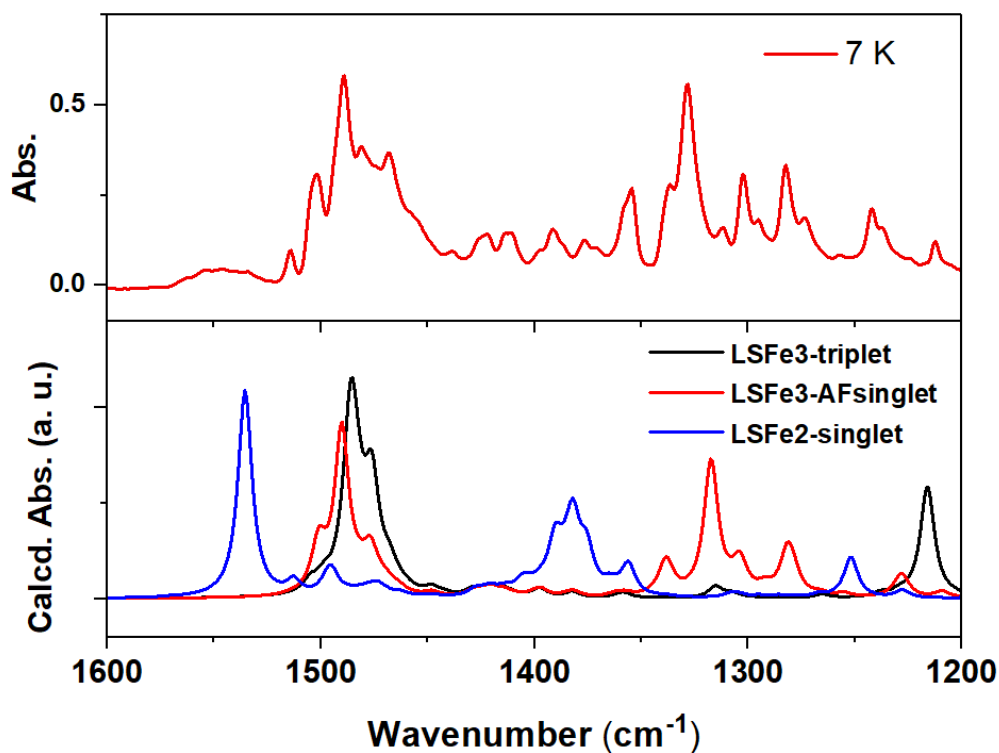

**Supplementary Fig. 6 | Infrared (IR) spectrum recorded at 7 K (top) as compared to the calculated spectra for possible electronic configurations (bottom).** LSF3-triplet and LSF3-AF singlet represent the ferromagnetically and antiferromagnetically coupled  $[\text{Fe}^{3+}_{\text{LS}}\text{-dhbq}^{3-}\text{-Co}^{3+}_{\text{LS}}]$  states, respectively. LSF2-singlet represents the  $[\text{Fe}^{2+}_{\text{LS}}\text{-dhbq}^{2-}\text{-Co}^{3+}_{\text{LS}}]$  state (the calculated IR spectra were scaled by 0.985 for comparison with the experimental results).

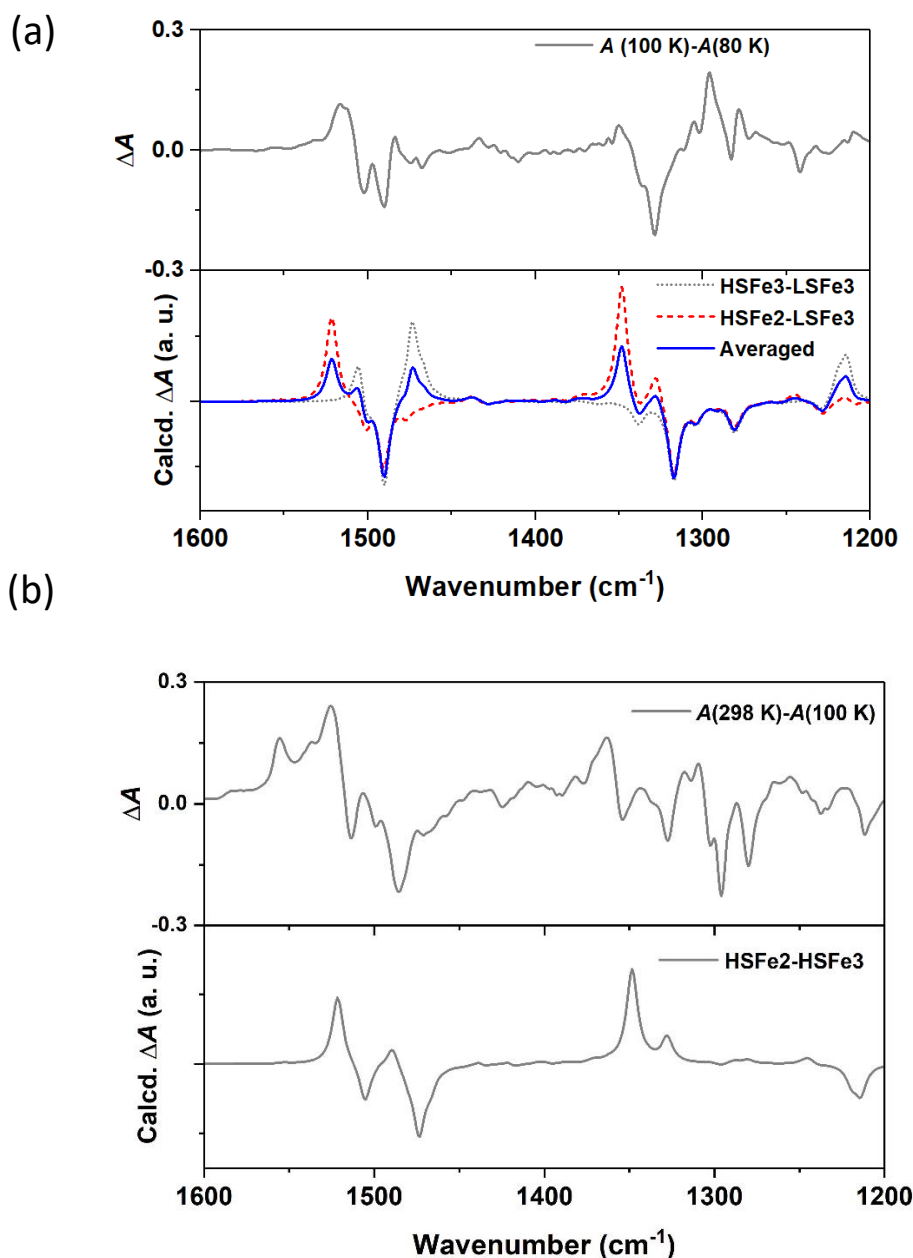

**Supplementary Fig. 7 | Experimental difference infrared (IR) absorption of 1(PF<sub>6</sub>)<sub>3</sub> during and after the abrupt transition process (top) and calculated difference IR spectra (bottom).** The experimental data was calculated as the difference between the spectra recorded at (a) 100 and 80 K and at (b) 298 and 100 K. HSF<sub>3</sub>, HSF<sub>2</sub>, and LSF<sub>3</sub> represent the [Fe<sup>3+</sup><sub>HS</sub>-dhbq<sup>3-</sup>-Co<sup>3+</sup><sub>LS</sub>], [Fe<sup>2+</sup><sub>HS</sub>-dhbq<sup>2-</sup>-Co<sup>3+</sup><sub>LS</sub>] and [Fe<sup>3+</sup><sub>LS</sub>-dhbq<sup>3-</sup>-Co<sup>3+</sup><sub>LS</sub>] states, respectively. The averaged difference of absorption was calculated as the mean value of the difference absorption of the [Fe<sup>3+</sup><sub>HS</sub>-dhbq<sup>3-</sup>-Co<sup>3+</sup><sub>LS</sub>] and [Fe<sup>3+</sup><sub>LS</sub>-dhbq<sup>3-</sup>-Co<sup>3+</sup><sub>LS</sub>] states and that of the [Fe<sup>2+</sup><sub>HS</sub>-dhbq<sup>2-</sup>-Co<sup>3+</sup><sub>LS</sub>] and [Fe<sup>3+</sup><sub>LS</sub>-dhbq<sup>3-</sup>-Co<sup>3+</sup><sub>LS</sub>] states. It should be noted that the AF [Fe<sup>3+</sup><sub>HS</sub>-

$\text{dmbq}^{3-}\text{--Co}^{3+}_{\text{LS}}$  state observed experimentally could not be obtained at the level of our DFT calculations. To simulate the change in IR absorption from the electron transfer behavior, the IR absorption of the ferromagnetically coupled  $[\text{Fe}^{3+}_{\text{HS}}\text{--dmbq}^{3-}\text{--Co}^{3+}_{\text{LS}}]$  ( $S = 3$ ) was calculated following the same methodology. It was found that the IR changes during the abrupt transition process are consistent with both “pure” spin crossover and electron transfer-coupled spin transition behavior (a). On the contrary, the calculated electron transfer feature is in good agreement with the experimental ones, further supporting our assumption that there is a continuous electron transfer process occurring after the abrupt transition process (b). (The calculated IR spectra were scaled by 0.985 for comparison with the experimental results).

(a)

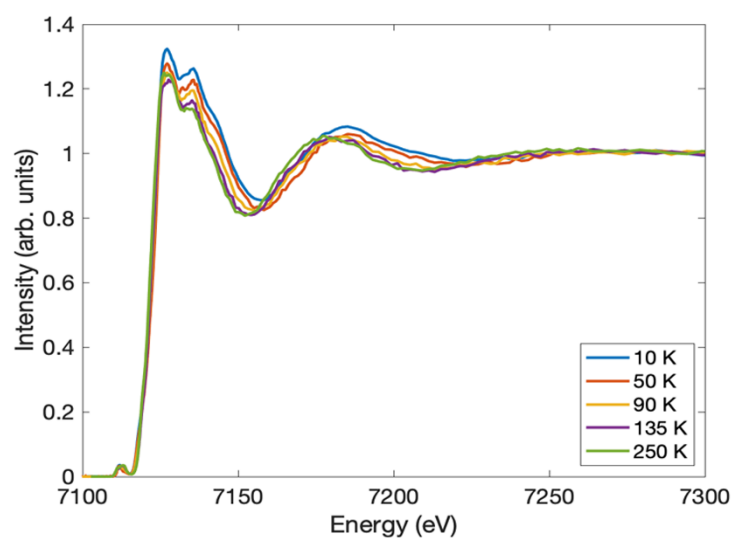

(b)

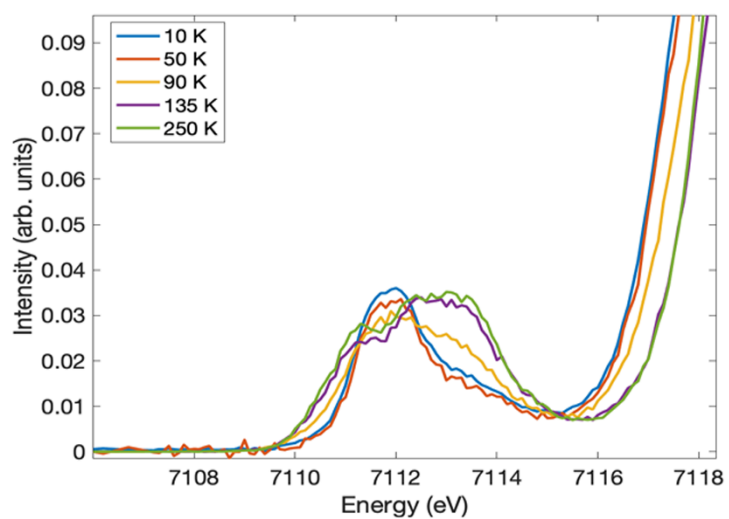

(c)

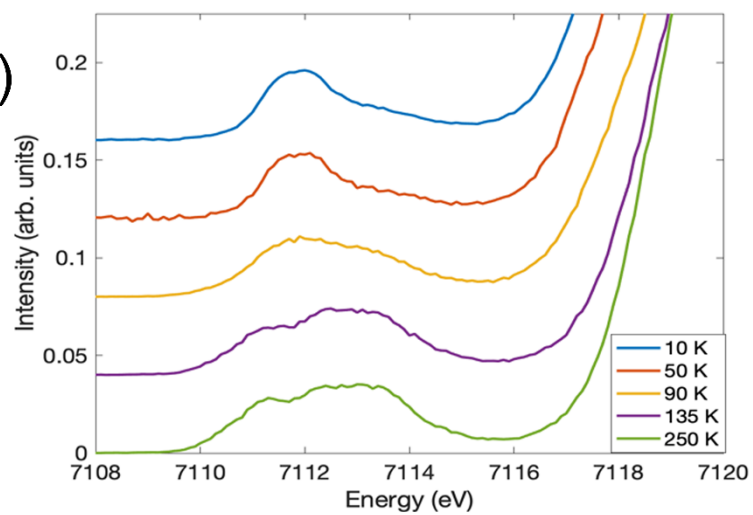

**Supplementary Fig. 8 | (a) Variable-temperature HERFD-XANES measurement of  $1(\text{PF}_6)_3$ . (b) HERFD-XANES pre-edge structure measurement of  $1(\text{PF}_6)_3$ . (c) stacked diagram of HERFD-XANES pre-edge structure derived from (b).**

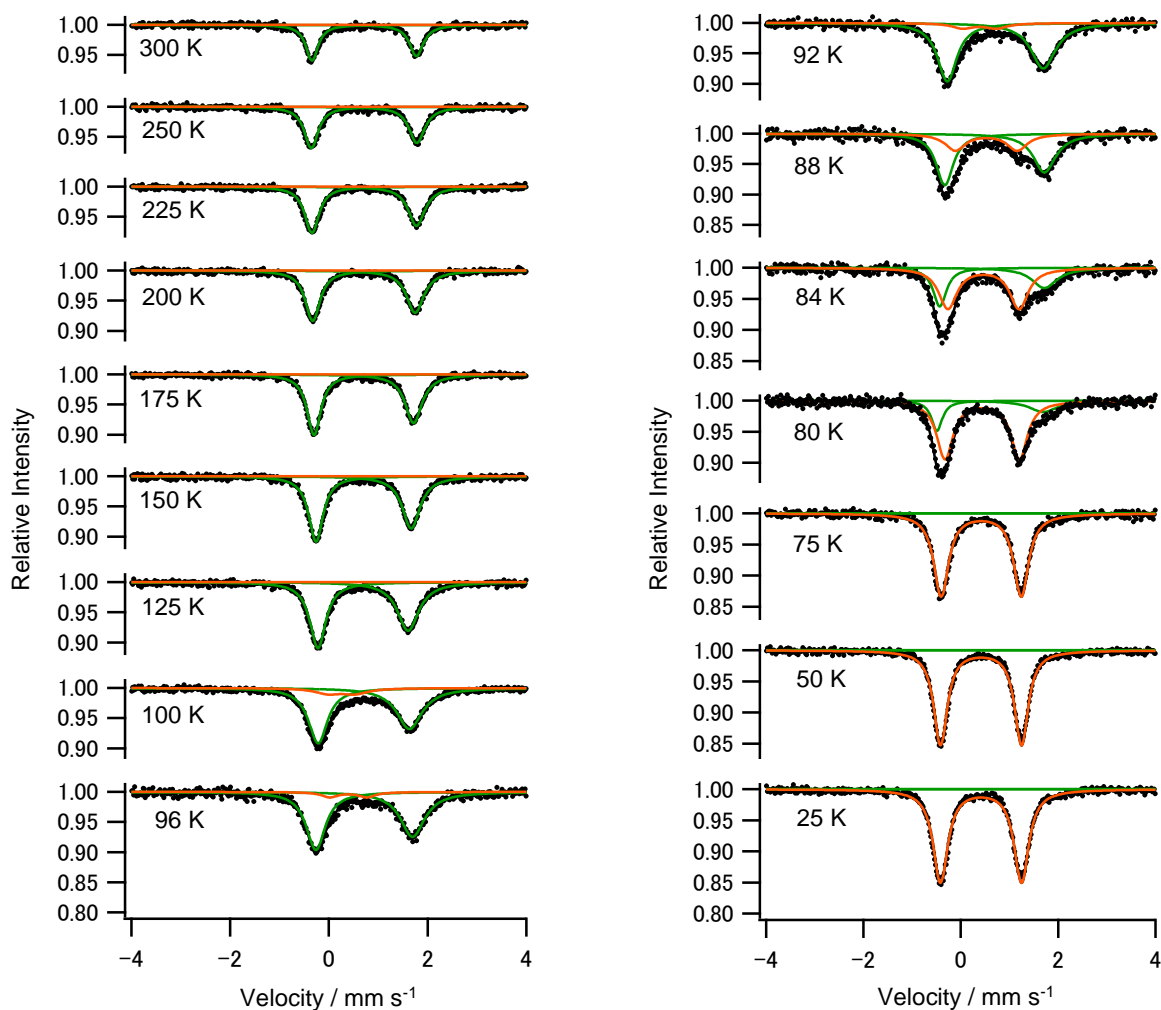

**Supplementary Fig. 9** | Temperature dependent Mössbauer spectra of  $1(\text{PF}_6)_3$  between the temperature range of 300 to 25 K. Spin transition is observed at approximately 90 K. Upon heating above spin transition temperature, the QS value is slightly getting larger, which suggests that the contribution of  $[\text{Fe}^{2+}_{\text{HS}}\text{-d}^5\text{h}^5\text{b}^2\text{-Co}^{3+}_{\text{LS}}]$  state increases with increasing temperature at the high temperature phase.

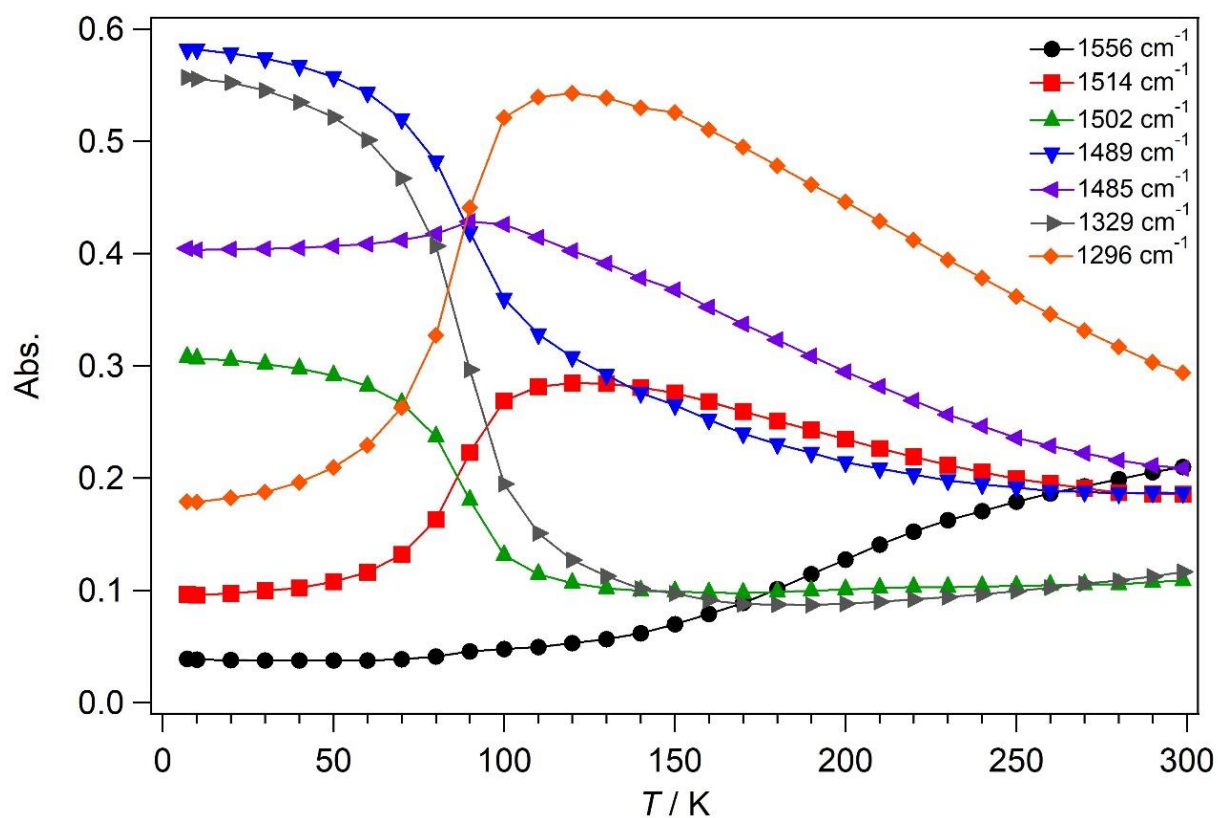

**Supplementary Fig. 10 | Variable-temperature infrared absorption change at characteristic wavenumbers for complex 1(PF<sub>6</sub>)<sub>3</sub>.**



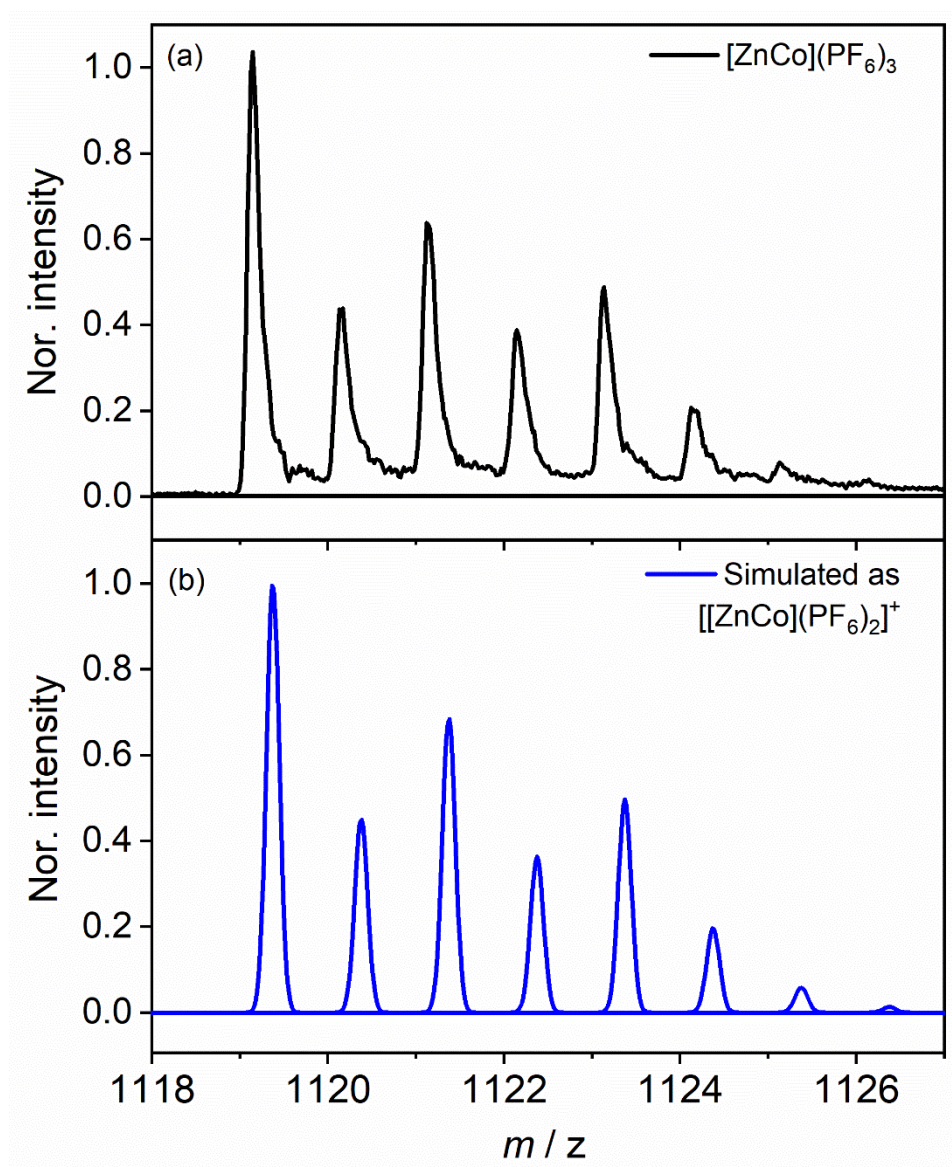

**Supplementary Fig. 11 | ESI-MS spectrum of  $[\text{ZnCo}](\text{PF}_6)_3$  in acetone.** (a) The spectra exhibit the molecular peak of the  $[\text{ZnCo}](\text{PF}_6)_3$  ( $m/z = 1121.3$ ). (b) Isotopic distribution simulation of  $[[\text{ZnCo}](\text{PF}_6)_2]^+(\text{C}_{38}\text{H}_{74}\text{N}_8\text{O}_4\text{ZnCoP}_2\text{F}_{12})$ .

### Supplementary Table 1 | Elemental analysis for 1(PF<sub>6</sub>)<sub>3</sub>

Metal elemental analysis:

|                                | Co   | Fe   |
|--------------------------------|------|------|
| <b>1<sup>st</sup> analysis</b> | 4.72 | 4.49 |
| <b>2<sup>nd</sup> analysis</b> | 4.71 | 4.47 |
| <b>Average value</b>           | 4.72 | 4.48 |

The composition ratio:

|                                | Co    | Fe |
|--------------------------------|-------|----|
| <b>1<sup>st</sup> analysis</b> | 0.998 | 1  |
| <b>2<sup>nd</sup> analysis</b> | 0.999 | 1  |
| <b>Average value</b>           | 0.998 | 1  |

**Supplementary Table 2 | Crystallographic Data Collection and Structural Refinement Information for 1(PF<sub>6</sub>)<sub>3</sub>**

|                                                       | <b>1(PF<sub>6</sub>)<sub>3</sub></b>                                                             |                              |                              |                              |                              |                              |
|-------------------------------------------------------|--------------------------------------------------------------------------------------------------|------------------------------|------------------------------|------------------------------|------------------------------|------------------------------|
| Empirical Formula                                     | C <sub>38</sub> H <sub>74</sub> CoF <sub>18</sub> FeN <sub>8</sub> O <sub>4</sub> P <sub>3</sub> |                              |                              |                              |                              |                              |
| Formula Weight                                        | 1256.74                                                                                          |                              |                              |                              |                              |                              |
| Temperature(K)                                        | 60                                                                                               | 100                          | 150                          | 200                          | 250                          | 300                          |
| Crystal System                                        | <i>monoclinic</i>                                                                                | <i>monoclinic</i>            | <i>monoclinic</i>            | <i>monoclinic</i>            | <i>monoclinic</i>            | <i>monoclinic</i>            |
| Lattice Type                                          | Primitive                                                                                        | Primitive                    | Primitive                    | Primitive                    | Primitive                    | Primitive                    |
| Space group                                           | <i>P</i> 2 <sub>1</sub> (#4)                                                                     | <i>P</i> 2 <sub>1</sub> (#4) | <i>P</i> 2 <sub>1</sub> (#4) | <i>P</i> 2 <sub>1</sub> (#4) | <i>P</i> 2 <sub>1</sub> (#4) | <i>P</i> 2 <sub>1</sub> (#4) |
| <i>a</i> (Å)                                          | 8.8140(7)                                                                                        | 8.8712(3)                    | 8.8898(3)                    | 8.9174(3)                    | 8.9381(3)                    | 8.9724(4)                    |
| <i>b</i> (Å)                                          | 29.745(2)                                                                                        | 30.2203(9)                   | 30.2852(9)                   | 30.3617(8)                   | 30.4465(8)                   | 30.5418(9)                   |
| <i>c</i> (Å)                                          | 10.1654(8)                                                                                       | 10.1450(3)                   | 10.1741(3)                   | 10.2057(3)                   | 10.2227(4)                   | 10.2409(4)                   |
| <i>a</i> (deg.)                                       | 90                                                                                               | 90                           | 90                           | 90                           | 90                           | 90                           |
| <i>b</i> (deg.)                                       | 110.057(8)                                                                                       | 110.049(4)                   | 110.058(4)                   | 110.037(4)                   | 110.053(4)                   | 110.044(4)                   |
| <i>g</i> (deg.)                                       | 90                                                                                               | 90                           | 90                           | 90                           | 90                           | 90                           |
| <i>V</i> (Å <sup>3</sup> )                            | 2503.5(4)                                                                                        | 2554.96(15)                  | 2573.02(15)                  | 2595.92(15)                  | 2613.29(16)                  | 2636.36(19)                  |
| Z value                                               | 2                                                                                                | 2                            | 2                            | 2                            | 2                            | 2                            |
| <i>D</i> <sub>calc</sub> (g/cm <sup>3</sup> )         | 1.667                                                                                            | 1.634                        | 1.622                        | 1.608                        | 1.597                        | 1.583                        |
| radiation                                             | MoKα (λ = 0.71073)                                                                               |                              |                              |                              |                              |                              |
| <i>R</i> <sub>1</sub> ( <i>I</i> > 2.00σ( <i>I</i> )) | 0.0485                                                                                           | 0.0525                       | 0.0523                       | 0.0508                       | 0.0508                       | 0.0544                       |
| <i>wR</i> <sub>2</sub> ( <i>all</i> )                 | 0.1399                                                                                           | 0.1301                       | 0.1302                       | 0.1308                       | 0.1308                       | 0.153                        |
| GOF                                                   | 1.094                                                                                            | 1.047                        | 1.046                        | 1.058                        | 1.057                        | 1.056                        |
| Flack parameter                                       | 0.15(2)                                                                                          | 0.032(7)                     | 0.039(9)                     | 0.032(8)                     | 0.034(8)                     | 0.037(8)                     |
| CCDC                                                  | 2025869                                                                                          | 2025870                      | 2025871                      | 2025872                      | 2025873                      | 2025874                      |

$$^aR_1 = \Sigma ||F_o| - |F_c|| / \Sigma |F_o|. \quad ^bR_2 = [\Sigma \{w(F_o^2 - F_c^2)^2\} / \Sigma \{w(F_o^2)^2\}]^{1/2}$$

**Supplementary Table 3 | Selected Bond Lengths (Å) for 1(PF<sub>6</sub>)<sub>3</sub>**

| <b>1(PF<sub>6</sub>)<sub>3</sub></b> |          |          |          |          |          |          |
|--------------------------------------|----------|----------|----------|----------|----------|----------|
|                                      | 60 K     | 100 K    | 150 K    | 200 K    | 250 K    | 300 K    |
| Fe1-O1 (Å)                           | 1.904(5) | 1.987(4) | 2.009(4) | 2.024(3) | 2.035(4) | 2.059(4) |
| Fe1-O2 (Å)                           | 1.904(5) | 1.991(5) | 2.006(4) | 2.021(4) | 2.042(4) | 2.048(4) |
| Fe1-N1 (Å)                           | 2.038(5) | 2.109(5) | 2.124(5) | 2.130(4) | 2.135(5) | 2.129(4) |
| Fe1-N2 (Å)                           | 2.060(5) | 2.145(5) | 2.155(5) | 2.162(4) | 2.168(5) | 2.164(5) |
| Fe1-N3 (Å)                           | 2.026(5) | 2.122(5) | 2.139(5) | 2.140(5) | 2.133(4) | 2.143(5) |
| Fe1-N4 (Å)                           | 2.045(5) | 2.143(5) | 2.156(5) | 2.165(5) | 2.165(5) | 2.173(5) |
| Co1-O3 (Å)                           | 1.893(4) | 1.893(4) | 1.895(4) | 1.901(4) | 1.891(4) | 1.905(4) |
| Co1-O4 (Å)                           | 1.891(5) | 1.891(5) | 1.889(4) | 1.893(4) | 1.904(4) | 1.891(4) |
| Co1-N5 (Å)                           | 1.987(5) | 1.979(5) | 1.980(5) | 1.983(4) | 1.996(5) | 1.988(5) |
| Co1-N6 (Å)                           | 2.015(5) | 2.020(5) | 2.023(5) | 2.024(5) | 2.030(5) | 2.023(5) |
| Co1-N7 (Å)                           | 2.012(5) | 1.996(5) | 1.991(5) | 1.993(5) | 1.985(4) | 1.990(5) |
| Co1-N8 (Å)                           | 2.026(5) | 2.024(5) | 2.025(5) | 2.029(5) | 2.022(5) | 2.032(5) |

**Supplementary Table 4 |  $^{57}\text{Fe}$  Mössbauer spectral parameters for  $1(\text{PF}_6)_3$ . IS (isomer shift), QS (quadrupole splitting) and LW (line width).**

| Asymmetric doublet (high-temperature phase) |                 |                             |                             |                                          | Symmetric doublet (low-temp. phase) |                             |                             |                             |
|---------------------------------------------|-----------------|-----------------------------|-----------------------------|------------------------------------------|-------------------------------------|-----------------------------|-----------------------------|-----------------------------|
| <i>T</i><br>(K)                             | Fraction<br>(%) | IS<br>(mm s <sup>-1</sup> ) | QS<br>(mm s <sup>-1</sup> ) | LW (left/right)<br>(mm s <sup>-1</sup> ) | Fraction<br>(%)                     | IS<br>(mm s <sup>-1</sup> ) | QS<br>(mm s <sup>-1</sup> ) | LW<br>(mm s <sup>-1</sup> ) |
| 300                                         | 100             | 0.715(2)                    | 2.117(2)                    | 0.298(8) /0.339(9)                       | 0                                   |                             |                             |                             |
| 250                                         | 100             | 0.712(2)                    | 2.139(2)                    | 0.340(7) /0.387(8)                       | 0                                   |                             |                             |                             |
| 225                                         | 100             | 0.715(2)                    | 2.121(2)                    | 0.348(6) /0.412(7)                       | 0                                   |                             |                             |                             |
| 200                                         | 100             | 0.710(2)                    | 2.077(2)                    | 0.363(6) /0.431(7)                       | 0                                   |                             |                             |                             |
| 175                                         | 100             | 0.707(2)                    | 2.019(2)                    | 0.335(4) /0.418(5)                       | 0                                   |                             |                             |                             |
| 150                                         | 100             | 0.702(2)                    | 1.928(2)                    | 0.350(4) /0.441(6)                       | 0                                   |                             |                             |                             |
| 125                                         | 100             | 0.690(2)                    | 1.828(2)                    | 0.390(4) /0.529(6)                       | 0                                   |                             |                             |                             |
| 100                                         | 88(2)           | 0.705(2)                    | 1.851(2)                    | 0.466(8) /0.628(11)                      | 12(2)                               | 0.26(3)                     | 0.55(5)                     | 0.65(10)                    |
| 96                                          | 93(2)           | 0.714(3)                    | 1.960(3)                    | 0.465(10)/0.60(2)                        | 7(2)                                | 0.39(3)                     | 0.75(6)                     | 0.42(9)                     |
| 92                                          | 91(2)           | 0.708(3)                    | 1.973(3)                    | 0.477(10)/0.61(2)                        | 9(2)                                | 0.39(4)                     | 0.69(7)                     | 0.54(11)                    |
| 88                                          | 72(3)           | 0.695(5)                    | 2.050(5)                    | 0.42(2) /0.56(2)                         | 28(3)                               | 0.521(13)                   | 1.27(3)                     | 0.50(4)                     |
| 84                                          | 41(3)           | 0.642(10)                   | 2.148(10)                   | 0.33(2) /0.62(4)                         | 59(3)                               | 0.464(5)                    | 1.463(13)                   | 0.45(2)                     |
| 80                                          | 26(2)           | 0.61(2)                     | 2.18(2)                     | 0.27(2) /0.71(7)                         | 74(2)                               | 0.438(3)                    | 1.530(8)                    | 0.403(10)                   |
| 75                                          | 0               |                             |                             |                                          | 100                                 | 0.418(13)                   | 1.644(3)                    | 0.365(4)                    |
| 50                                          | 0               |                             |                             |                                          | 100                                 | 0.4145(8)                   | 1.662(2)                    | 0.335(2)                    |
| 25                                          | 0               |                             |                             |                                          | 100                                 | 0.4140(9)                   | 1.664(2)                    | 0.362(3)                    |

**Supplementary Table 5 | Crystallographic Data Collection and Structural Refinement Information for [ZnCo](PF<sub>6</sub>)<sub>3</sub>**

|                                                      | [ZnCo](PF <sub>6</sub> ) <sub>3</sub>                                                            |                              |
|------------------------------------------------------|--------------------------------------------------------------------------------------------------|------------------------------|
| Empirical Formula                                    | C <sub>38</sub> H <sub>74</sub> CoF <sub>18</sub> ZnN <sub>8</sub> O <sub>4</sub> P <sub>3</sub> |                              |
| Formula Weight                                       | 1266.26                                                                                          |                              |
| Temperature(K)                                       | 100                                                                                              | 250                          |
| Crystal System                                       | <i>monoclinic</i>                                                                                | <i>monoclinic</i>            |
| Lattice Type                                         | Primitive                                                                                        | Primitive                    |
| Space group                                          | <i>P</i> 2 <sub>1</sub> (#4)                                                                     | <i>P</i> 2 <sub>1</sub> (#4) |
| <i>a</i> (Å)                                         | 8.8920(2)                                                                                        | 8.9675(3)                    |
| <i>b</i> (Å)                                         | 30.4196(5)                                                                                       | 30.5614(6)                   |
| <i>c</i> (Å)                                         | 10.2096(3)                                                                                       | 10.1886(3)                   |
| <i>a</i> (deg.)                                      | 90                                                                                               | 90                           |
| <i>b</i> (deg.)                                      | 110.326(3)                                                                                       | 110.067(4)                   |
| <i>g</i> (deg.)                                      | 90                                                                                               | 90                           |
| <i>V</i> (Å <sup>3</sup> )                           | 2589.64(12)                                                                                      | 2622.77(14)                  |
| Z value                                              | 2                                                                                                | 2                            |
| <i>D</i> <sub>calc</sub> (g/cm <sup>3</sup> )        | 1.624                                                                                            | 1.603                        |
| radiation                                            | MoKα (λ = 0.71073)                                                                               |                              |
| <i>R</i> <sub>1</sub> ( <i>I</i> >2.00σ( <i>I</i> )) | 0.0389                                                                                           | 0.0368                       |
| <i>wR</i> <sub>2</sub> ( <i>all</i> )                | 0.0998                                                                                           | 0.0968                       |
| GOF                                                  | 1.027                                                                                            | 1.057                        |
| Flack parameter                                      | 0.010(4)                                                                                         | 0.001(4)                     |
| CCDC                                                 | 2025875                                                                                          | 2025876                      |

$$^aR_1 = \Sigma ||F_o| - |F_c|| / \Sigma |F_o|. \quad ^bR_2 = [\Sigma \{w(F_o^2 - F_c^2)^2\} / \Sigma \{w(F_o^2)^2\}]^{1/2}$$

## References:

- 48 Sheldrick, G. M. Crystal structure refinement with SHELXL. *Acta Crystallographica Section C Structural Chemistry* **71**, 3-8 (2015).
- 49 Dolomanov, O. V. OLEX2: a complete structure solution, refinement and analysis program. *J. Appl. Cryst.* **42**, 339-341 (2009).
- 50 Gaussian 09, Revision E.01, Frisch, M. J.; Trucks, G. W.; Schlegel, H. B.; Scuseria, G. E.; Robb, M. A.; Cheeseman, J. R.; Scalmani, G.; Barone, V.; Mennucci, B.; Petersson, G. A.; Nakatsuji, H.; Caricato, M.; Li, X.; Hratchian, H. P.; Izmaylov, A. F.; Bloino, J.; Zheng, G.; Sonnenberg, J. L.; Hada, M.; Ehara, M.; Toyota, K.; Fukuda, R.; Hasegawa, J.; Ishida, M.; Nakajima, T.; Honda, Y.; Kitao, O.; Nakai, H.; Vreven, T.; Montgomery, J. A., Jr.; Peralta, J. E.; Ogliaro, F.; Bearpark, M.; Heyd, J. J.; Brothers, E.; Kudin, K. N.; Staroverov, V. N.; Kobayashi, R.; Normand, J.; Raghavachari, K.; Rendell, A.; Burant, J. C.; Iyengar, S. S.; Tomasi, J.; Cossi, M.; Rega, N.; Millam, J. M.; Klene, M.; Knox, J. E.; Cross, J. B.; Bakken, V.; Adamo, C.; Jaramillo, J.; Gomperts, R.; Stratmann, R. E.; Yazyev, O.; Austin, A. J.; Cammi, R.; Pomelli, C.; Ochterski, J. W.; Martin, R. L.; Morokuma, K.; Zakrzewski, V. G.; Voth, G. A.; Salvador, P.; Dannenberg, J. J.; Dapprich, S.; Daniels, A. D.; Farkas, Ö.; Foresman, J. B.; Ortiz, J. V.; Cioslowski, J.; Fox, D. J. Gaussian, Inc., Wallingford CT, 2009.
- 51 Wachters, A. J. H. Gaussian Basis Set for Molecular Wavefunctions Containing Third-Row Atoms. *J. Chem. Phys.* **52**, 1033-1036 (1970).
- 52 Hay, P. J. Gaussian basis sets for molecular calculations. The representation of 3d orbitals in transition-metal atoms. *J. Chem. Phys.* **66**, 4377-4384 (1977).
- 53 Dunning, T. H. Jr. & Hay, P. J. in *Modern Theoretical Chemistry*, Ed. Schaefer, H. F. III, Vol. 3 (Plenum, New York, 1977) 1-28.
- 54 Becke, A. D. Density-functional thermochemistry. III. The role of exact exchange. *J. Chem. Phys.* **98**, 5648-5652 (1993).
- 55 Reiher, M. Theoretical Study of the Fe(phen)<sub>2</sub>(NCS)<sub>2</sub> Spin-Crossover Complex with Reparametrized Density Functionals. *Inorg. Chem.* **41**, 6928-6935 (2002).
